# Supplementary material for: Admixture Mapping Scans Identify a Locus Affecting Retinal Vascular Caliber in Hypertensive African Americans: the Atherosclerosis Risk in Communities (ARIC) Study
Source: PubMed Central journal article supplement (PMC2855324; doi:10.1371/journal.pgen.1000908), 2010-04-15

**Figure S1. Genome-wide admixture mapping scans for loci affecting retinal arteriolar caliber in hypertensive individuals.** For case-only analysis (LOD score, red line), the genome-wide score was 0.18, which did not reaching the threshold of  $>2$  for significance. The highest locus-specific LOD was 2.37, arising from chromosome 5, followed by a LOD score of 2.04 on chromosome 6. For case-control analysis (Z score, blue gray line), the highest Z score was 3.73 ( $P = 1.91 \times 10^{-4}$ ), located on chromosome 6.

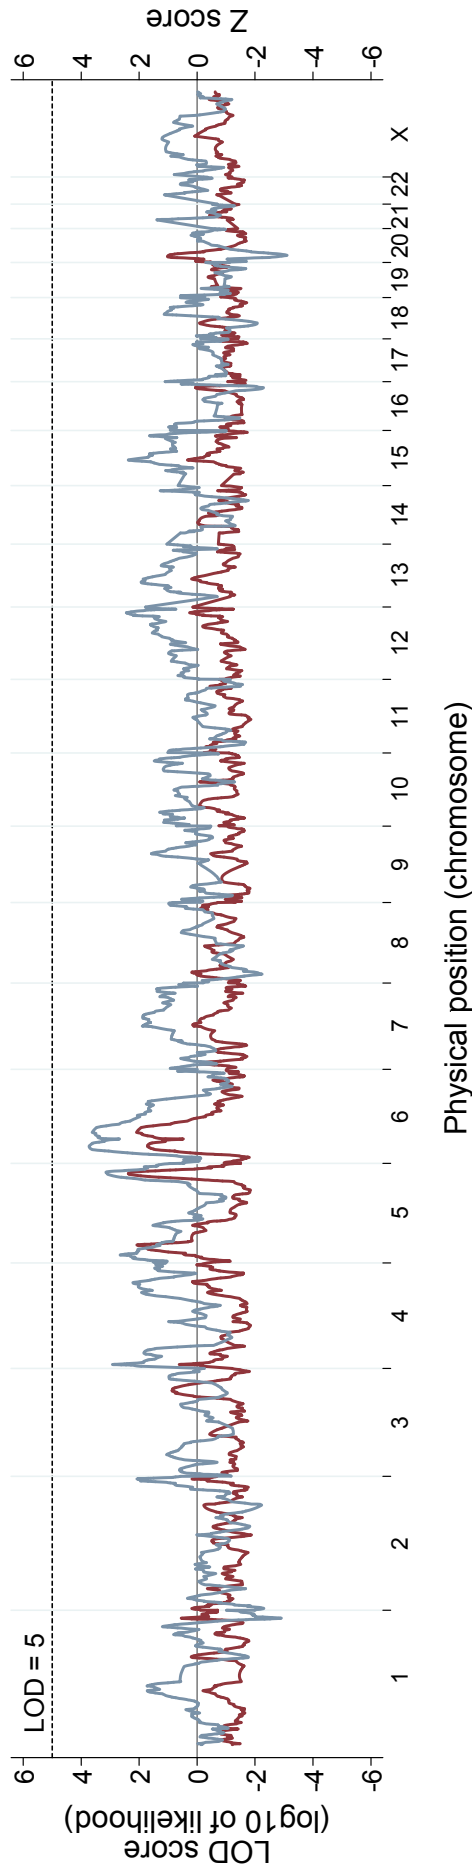

Supplement: pgen.1000908.s001.pdf [file pgen.1000908.s001.pdf]
